1 **Laboratory rearing alters activity and sleep patterns in the olive fruit fly**

2 **Anastasia M. Terzidou<sup>1</sup>, Dimitrios S. Koveos<sup>1</sup>, Nikos T. Papadopoulos<sup>2</sup>, James R. Carey<sup>3,4</sup>**

3 **& Nikos A. Kouloussis<sup>1\*</sup>**

4

5 <sup>1</sup>Laboratory of Applied Zoology and Parasitology, School of Agriculture, Aristotle University of  
6 Thessaloniki, 541 24 Thessaloniki, Greece. Email: [nikoul@agro.auth.gr](mailto:nikoul@agro.auth.gr);

7 <sup>2</sup>Laboratory of Entomology and Agricultural Zoology, Department of Agriculture, Crop Production and  
8 Rural Environment, University of Thessaly, N. Ionia Magnisia, Greece;

9 <sup>3</sup>Department of Entomology, University of California, Davis, 95616, USA,

10 <sup>4</sup>Center on the Economics and Demography of Aging, University of California, Berkeley, 94720, USA

11 \*Corresponding author

12 Email: [nikoul@agro.auth.gr](mailto:nikoul@agro.auth.gr) (NK)

13

14

15

16

17

18

19

20

21

22

23

## 24 **Abstract**

25 Olive fruit flies, *Bactrocera oleae* (Diptera: Tephritidae) that are laboratory reared in artificial diet  
26 are essential for the genetic control techniques for this pest. However, the colony's laboratory  
27 adaptation can affect their quality. We used the Locomotor Activity Monitor (LAM25, Trikinetics,  
28 MA, USA) to track the activity and sleep patterns of adult olive fruit flies reared as immatures in  
29 olives (F2-F3 generation) and in artificial diet (>300 generations). Counts of beam breaks caused  
30 by the adult fly activity were used as an estimation of its locomotor activity levels during the light  
31 and dark period. A longer than five minutes period of adults' inactivity during the dark period was  
32 considered as one sleep episode. Activity levels and sleep parameters were found to be dependent  
33 on sex, mating status and rearing history. In virgin flies reared in olives, males were more active  
34 than females and increased their locomotor activity towards the end of the light period. Mating  
35 decreased the locomotor activity levels of males, but not of females olive-reared flies. Laboratory  
36 flies reared in artificial diet had lower locomotor activity levels during the light period and more  
37 sleep episodes of shorter duration compared to flies reared in olives. We describe the diurnal  
38 locomotor activity patterns of *B. oleae* adults reared in olive fruits and in artificial diet. We discuss  
39 how locomotor activity and sleep pattern differences may affect the laboratory flies' ability to  
40 compete with wild males in the field.

41

42

43

## 44 Introduction

45 The olive fruit fly has been the most important pest of olives in Mediterranean countries for at  
46 least 2000 years [1] and in 1998 it was first detected in California [2]. Its distribution now covers  
47 the Mediterranean basin, North and Sub-Saharan Africa, south-west Asia and North America [3].  
48 Because of the significant economic damage caused by *B. oleae* and the intense use of insecticides  
49 to manage it, Sterile Insect Technique (SIT), as well as a self-limiting olive fly technology have  
50 been proposed to control this pest [4,5]. Both methods require the mass-release of quality  
51 laboratory male olive fruit flies reared in artificial diet, that will be able to survive, search, find,  
52 and mate effectively with the wild population. Selection during colonization and mass-rearing  
53 normally changes the biology and behavior of an insect species. A common problem in mass-  
54 reared insects is the loss of irritability, because crowded rearing conditions select for individuals  
55 that ignore movements in their surroundings [6]. The mass-rearing conditions reduce the flight  
56 capacity of *Amyelois transitella* [7], and the overall activity of *Bactrocera tryoni* compared to  
57 wild population [8], while inbreeding in *Drosophila melanogaster* decreases locomotor activity  
58 and changes daily activity patterns [9]. It has been shown that in *Bactrocera dorsalis*, the time of  
59 mating - which is controlled by the circadian clock - can be altered in insects that have been  
60 adapted in laboratory rearing conditions, even after a period of just a year [10].

61 Sleep and sleep-like states are present in all animals and many studies have shown sleep-  
62 like states exist even in arthropods and nematodes [11]. The circadian system is responsible for  
63 controlling daily activity patterns, such as locomotion, mating, and also sleep [12,13]. Sleep is  
64 necessary for an animal's survival and health, including replenishment of energy stores, removal  
65 of harmful by-products, and maintenance of neural plasticity [14]. In *D. melanogaster* sleep  
66 deprivation can result to death [15, 16]. There is also evidence that night sleep disruption,

67 including sleep deprivation (total sleep loss) and sleep restriction (partial sleep loss), caused by a  
68 variety of biotic and abiotic factors in nature can cause changes in insect daily activity patterns  
69 with consequences in behavioral performance during active periods [17]. Daily rhythms of activity  
70 and rest can be recorded by placing individuals in glass tubes and monitoring the movements using  
71 infrared beam-based activity monitors like Locomotor Activity Monitor-LAM by Trikinetics  
72 (<https://trikinetics.com/>) [18]. *D. melanogaster* has been used extensively as a model organism  
73 for sleep studies [19, 20] where the duration of sleep episodes or bouts during the night indicates  
74 how well a fly can stay asleep [21]. In *Drosophila*, the 5 min threshold for defining sleep state is  
75 widely accepted [22]. One limitation of the LAM tracking system is that it cannot differentiate  
76 between inactivity and sleep [23]. For bumblebees, bouts of inactivity lasting more than 5 min  
77 during the night were visually associated with posture indicating sleep, but during the day,  
78 inactivity periods could not reliably be associated with sleep [24]. For this study, we accepted that  
79 a bout of more than 5 min of inactivity during the dark period or light period is considered a sleep  
80 or rest episode respectively.

81         The aim of this study was to record the diurnal patterns of locomotion of olive fruit flies,  
82 as a detailed tracking of their activity with the use of LAM. We focused on reproductively mature  
83 wild flies (F2-F3 generation reared in olive fruits) and how their diurnal patterns of locomotion  
84 change according to sex and mating status. We also studied the effect of laboratory rearing on  
85 artificial diet to the locomotor activity and sleep patterns of reproductively mature virgin male  
86 flies. We hypothesized that wild flies reared on olives would have higher locomotor activity levels  
87 than laboratory flies reared on artificial diet, as laboratory mass rearing is known to further  
88 decrease the tendency of flies to move [8].

89

## 90 **2. Materials and methods**

### 91 **2.1. Insect rearing**

92 The wild olive fruit fly colony was established with flies that emerged from infested olives field  
93 collected in late September in the area of Thessaloniki. Emerged adults were maintained in colony  
94 wooden cages (30 x 30 x 30 cm) under laboratory conditions (24±1.5 °C, RH 40±5 %, L:D 14:10),  
95 fed with a diet consisting of sugar, yeast hydrolysate and water (ratio 4:1:5) and allowed to oviposit  
96 in olives. Water was provided with a soaked cotton stick extruding from a small water container.  
97 Flies of this wild population that were grown in their larval stages in olives for 2-3 generations in  
98 our laboratory were used in our experiments (referred to as W flies hereafter).

99 We used laboratory adapted olive fruit flies reared in their larval stages in artificial diet  
100 (referred to as AR flies hereafter) from the colony maintained in our laboratory for more than 20  
101 generations. The colony was established from the “Democritus strain”, which was developed at  
102 the Democritus Nuclear Research Center, Athens, Greece and had already been reared for more  
103 than 300 generations. Adult flies were kept in wooden cages (30 x 30 x 30 cm) and each cage  
104 contained about 200 individuals. Adult food was given in the form of a liquid diet consisting of  
105 sugar, yeast hydrolysate and water (ratio 4:1:5) (no antibiotic was added). Egg yolk powder was  
106 added ad libitum as extra protein source for the colony AR flies. They were allowed to oviposit on  
107 beeswax domes (diameter = 2 cm) and eggs were collected every two days with a fine brush and  
108 washed with propionic acid solution (0.3 %). The collected eggs were then placed directly on the  
109 larval diet inside a Petri dish (94 x 16 mm). Larval artificial diet consisted of 550 ml of tap water,  
110 olive oil (20 ml), Tween 80 (7.5 ml), potassium sorbate (0.5 g), nipagin (2 g), crystalline sugar (20  
111 g), brewer’s yeast (75 g), soy hydrolysate (30 g), hydrochloric acid 2N (30 ml), and cellulose

112 powder as bulking medium (275 g) as described in Tsitsipis et al [25]. The diet was kept moist to  
113 stimulate last stage larvae to exit the diet which were then collected by sieving the sand on which  
114 the Petri dish was placed.

115 Newly emerged W and AR flies were separated by sex in the first 24h of their emergence,  
116 kept in plexiglass cages (15 x 15 x 15 cm) that contained 20 flies each and under the same  
117 conditions (T: 24±1.5°C, RH: 40±5%, L:D 14:10) and fed with the same diet consisting of sugar,  
118 yeast hydrolysate and water (ratio 4:1:5).

119 Male and female W flies of the same cohort were kept together after adult emergence in  
120 colony wooden cages (about 70-90 flies per cage) with the same diet and environmental conditions  
121 as above. They were considered mated by the time they were used for the bioassays (12-13 days  
122 old at the beginning of bioassay).

123 Laboratory adaptation results in more rapid sexual maturity rate for AR flies [26, 27].  
124 Sexual maturity begins on the 8th day of age of W flies of both sexes [28], while for AR males, it  
125 begins on the 2nd day and for AR females on the 3rd day of age. W flies used were 12-13 days old  
126 at the beginning of the bioassay, while AR flies were 6-7 days old, considering the AR flies' shorter  
127 longevity [29] and that AR flies for SIT purposes are released at a young age [30].

128

## 129 **2.2. Locomotor Activity**

130 We recorded the locomotor activity patterns of adult olive fruit flies by using the Locomotor  
131 Activity Monitor- LAM25 system (Trikinetics). In this system flies were individually kept in each  
132 of 32 glass tubes with 25 mm diameter and 125 mm length. On the one end of the tube, we adjusted  
133 a vinyl plastic stopper (CAP25-BLK- Vinyl Tube Cap-Trikinetics) inside which was an agar-based  
134 gel diet with sugar, yeast hydrolysate, agar, nipagin and water (4:1:0.2:0.1:20) for food and water

135 provision [31]. The other end of the tube was covered with a piece of organdie to allow ventilation.  
136 The tubes were maintained in a climatic room under a photoperiod of 14:10 L:D. The light period  
137 was from 07:00 to 21:00 (hereafter referred to as LP), and dark period was from 21:00 to 07:00  
138 (hereafter referred to as DP). Activity at each tube was measured every minute as counts of infrared  
139 light beams crossed.

140 Three LAM devices were used simultaneously for the *W* flies bioassay. Thirty-two *W*  
141 virgin males and thirty-two *W* virgin females were maintained in two LAMs. Sixteen *W* mated  
142 males and sixteen *W* mated females were maintained in the third LAM. They were monitored for  
143 5 consecutive days. After the completion of this bioassay, AR virgin flies (sixteen males and  
144 sixteen females) were maintained in one LAM device and monitored for 5 consecutive days.

145

## 146 **2.3. Data analysis**

147 The LAM devices were set to record the sum of movements each fly performed every minute and  
148 exported the data in monitor files as the number of counts for each tube. The raw monitor data  
149 were processed in the DAM FileScan software and activity data collected in 1-minute intervals (1-  
150 minute bins) were compressed and converted to 30-minute intervals (30-minute bins) for plotting  
151 purposes. Activity/sleep analysis was performed using an in-house MATLAB program called  
152 Sleep and Circadian Analysis MATLAB Program (SCAMP) [32]. Activity levels during the LP  
153 and DP were the total counts for each fly during the 14 h period of lights on and 10 h period of  
154 lights off respectively. We conventionally refer to bouts of > 5 min of inactivity as rest and sleep  
155 episodes when they occur during the LP and DP respectively. Activity levels, the number and  
156 duration of rest/sleep episodes were calculated as the average of 5 consecutive days of monitoring  
157 after excluding the flies that died during the bioassay. Sample size was  $n = 32$  *W* virgin flies of

158 each sex,  $n = 16$  AR virgin flies of each sex, and  $n = 12$  male and  $n = 14$  female W mated flies.  
159 For all the comparisons, a 2-tailed  $t$ -test was performed (level of significance  $\alpha = 0.05$ ). with the  
160 statistical software package JMP 14.1.0 [33].

161

## 162 **3. Results**

### 163 **3.1. Locomotor activity**

#### 164 **3.1.1. Locomotor activity of W flies**

165 The pattern of locomotor activity of W virgin males and females during 24-h in 30 min bins is  
166 shown in Fig 1A. The mean locomotor activity level (SE) of W virgin males was during the LP  
167 was 2031.3 (132.0) counts and that of W virgin females was 1394.2 (86.6) counts. They differed  
168 significantly (2-tailed  $t$ -test = 4.035,  $df = 54$ ,  $P = .0002$ ). However, during the DP, the mean  
169 locomotor activity level (SE) of W virgin males and W virgin females was 257.2 (17.8) counts  
170 and 246.6 (16.3) counts respectively and did not differ significantly (2-tailed  $t$ -test = .438,  $df = 62$ ,  
171  $P = .662$ ). High levels of locomotor activity during the DP were recorded at the time of lights off  
172 and for the next hour after the transition to scotophase.

173

174 **Fig 1.** Locomotor activity levels (SE) of W virgin male and female flies (A) and W mated male and  
175 female flies (B) ( $n = 32$  W virgin flies of each sex,  $n = 12$  W mated males,  $n = 14$  W mated females  
176 averaged across 5 days of monitoring).

177

178 The pattern of locomotor activity of W mated males and females during 24-h in 30 min  
179 bins is shown in Fig 1B. The mean locomotor activity level (SE) of W mated males and W mated



180 females during the LP was 1153.1 (174.0) counts and 1081.9 (181.5) counts respectively and did  
181 not differ significantly (2-tailed  $t$ -test = .283,  $df$  = 24,  $P$  = .779). The mean locomotor activity level  
182 (SE) of W mated males and W mated females during the DP was 208.2 (30.5) counts and 219.0  
183 (26.3) counts respectively and did not differ significantly (2-tailed  $t$ -test = -0.266,  $df$  = 23,  $P$  =  
184 .792).

185 As shown in Fig 2, mating affects the locomotor activity of males but not of females. The  
186 mean locomotor activity was significantly higher in virgin W males compared to mated ones  
187 during LP (2-tailed  $t$ -test = 4.020,  $df$  = 24,  $P$  = .0005) but not during DP (2-tailed  $t$ -test = 1.383,  $df$   
188 = 19,  $P$  = .182). However, virgin and mated W females did not differ significantly in their mean  
189 locomotor activity during LP (2-tailed  $t$ -test = 1.553,  $df$  = 19,  $P$  = .136) or DP (2-tailed  $t$ -test =  
190 .889,  $df$  = 23,  $P$  = .382).

191

192 **Fig 2.** Mean (SE) level of locomotor activity of W virgin and mated flies of both sexes during the LP ( $n$  =  
193 32 W virgin flies of each sex,  $n$  = 12 W mated males and  $n$  = 14 W mated females, averaged across 5 days  
194 of monitoring) (\*\* $P$  < .001).

195

### 196 **3.1.2. Locomotor activity of AR flies**

197 The pattern of locomotor activity of AR virgin males and females in 30-min bins across 24 h is  
198 shown in Fig 3. The mean locomotor activity level (SE) of AR virgin males and AR virgin females  
199 during the LP was 363.0 (63.2) counts and 324.3 (45.6) counts respectively. Contrary to the W  
200 flies, in AR flies there was no statistical difference between females and males during the LP (2-  
201 tailed  $t$ -test = .467,  $df$  = 27,  $P$  = .623). The mean locomotor activity level (SE) of AR virgin males  
202 and AR virgin females during the DP was 100.5 (10.5) counts and 68.6 (9.6) counts respectively.

203 In contrast to the W flies, there was a statistical difference in locomotor activity between the AR  
204 female and male flies during the DP (2-tailed  $t$ -test = 2.236,  $df$  = 29,  $P$  = .0329).

205

206 **Fig 3.** Locomotor activity levels (SE) of AR virgin male and female flies ( $n$  = 16 flies of each sex,  
207 averaged across 5 days of monitoring).

208

### 209 **3.1.3. Comparison of locomotor activity between W and AR virgin flies**

210 There was significant difference in the mean locomotor activity during the LP between W and  
211 AR virgin flies of both sexes (2-tailed  $t$ -test = 11.398,  $df$  = 42,  $P$  < .0001 for males and  $t$ -test =  
212 10.926,  $df$  = 43,  $P$  < .0001 for females) (Fig 4).

213

214 **Fig 4.** Mean (SE) levels of locomotor activity of W virgin and AR virgin flies as total counts of activity  
215 during the LP ( $n$  = 32 W flies of each sex,  $n$  = 16 AR flies of each sex, averaged across 5 days of  
216 monitoring) (\*\* $P$  < .001).

217

## 218 **3.2. Rest and sleep episodes**

### 219 **3.2.1. Rest and sleep episodes of W flies**

220 During the LP, the mean number of rest episodes (SE) of W virgin males was 12.1 (1.1) with mean  
221 duration (SE) 15.7 (1.5) min. The mean number of rest episodes (SE) of W virgin females was  
222 16.8 (1.2) with mean duration (SE) 15.5 (0.8) min. There was significant difference between virgin  
223 male and female flies in the mean number of rest episodes (2-tailed  $t$ -test = - 2.697 ,  $df$  = 61,  $P$  =  
224 .009) but not in their mean duration (2-tailed  $t$ -test = .193 ,  $df$  = 45,  $P$  = .847). During the DP, the  
225 mean number of sleep episodes (SE) of W virgin males was 2.9 (0.2) with mean duration (SE)

226 309.0 (21.1) min. The mean number of sleep episodes (SE) of W virgin females was 3.8 (0.2) with  
227 mean duration (SE) 255.8 (16.8) min. There was significant difference between the two sexes in  
228 the mean number of sleep episodes (2-tailed  $t$ -test = -2.602,  $df$  = 58,  $P$  = .011) but not in their mean  
229 duration (2-tailed  $t$ -test = 1.708,  $df$  = 58,  $P$  = .0902).

230 During the LP, the mean number of rest episodes (SE) of W mated males was 16.0 (2.0)  
231 with mean duration (SE) 77.5 (22.3) min. The mean number of rest episodes (SE) of W mated  
232 females was 19.6 (1.8) with mean duration (SE) 47.9 (13.3) min. There was no significant  
233 difference between the two sexes in the mean number of rest episodes (2-tailed  $t$ -test = -1.261,  $df$   
234 = 28,  $P$  = .217) or their mean duration (2-tailed  $t$ -test = 1.133,  $df$  = 23,  $P$  = .268). During the DP,  
235 the mean number of sleep episodes (SE) of W mated males was 4.0 (0.5) with mean duration (SE)  
236 250.2 (39.9) min. The mean number of sleep episodes (SE) of W mated females was 4.3 (0.3) with  
237 mean duration (SE) 219.2 (29.6) min. There was no significant difference between the two sexes  
238 in mean number of sleep episodes (2-tailed  $t$ -test = -0.502,  $df$  = 26,  $P$  = .619) or their mean duration  
239 (2-tailed  $t$ -test = .624,  $df$  = 26,  $P$  = .537).

240 W mated males differed in the mean duration of rest episodes compared to W virgin males  
241 (2-tailed  $t$ -test = -2.747,  $df$  = 14,  $P$  = .0156), but no difference was detected in the number of rest  
242 episodes or the number and mean duration of sleep episodes between the two groups. Similarly,  
243 W virgin and mated females differed in the mean duration of rest episodes (2-tailed  $t$ -test = -  
244 2.426,  $df$  = 15,  $P$  = .0282), but not in their number nor in the mean duration and number of sleep  
245 episodes (Figs 5 and 6).

246

247

248 **Fig 5.** Mean (SE) number (A) and duration (B) of rest episodes of W virgin and mated flies of both sexes  
249 during the LP (\*  $P$  < .05, \*\*  $P$  < .01).

250

251 **Fig 6.** Mean (SE) number (A) and duration (B) of sleep episodes of W virgin and mated flies of both sexes  
252 during the DP (\*  $P < .05$ ).

253

### 254 **3.2.2. Rest and sleep episodes of AR flies**

255 During the LP, the mean number of rest episodes (SE) of AR virgin males was 9.7 (0.9) with mean  
256 duration (SE) 110.6 (15.5) min. The mean number of rest episodes (SE) of AR virgin females was  
257 16.0 (1.0) with mean duration (SE) 49.4 (5.0) min. There was significant difference between the  
258 two sexes in mean number of rest episodes (2-tailed  $t$ -test = -4.599,  $df = 29$ ,  $P < .0001$ ) and mean  
259 duration (2-tailed  $t$ -test = 3.735,  $df = 18$ ,  $P = .0015$ ). During the DP, the mean number of sleep  
260 episodes (SE) of AR virgin males was 9.3 (0.7) with mean duration (SE) 116.3 (15.2) min. The  
261 mean number of sleep episodes (SE) of AR virgin females was 5.6 (0.4) with mean duration (SE)  
262 194.1 (25.0) min. There was significant difference between the two sexes in number of sleep  
263 episodes (2-tailed  $t$ -test = 4.243,  $df = 24$ ,  $P = .0003$ ) and mean duration (2-tailed  $t$ -test = -2.656,  
264  $df = 24$ ,  $P = .0136$ ).

265

### 266 **3.2.3. Comparison of rest/sleep episodes between W and AR male flies**

267 W virgin males and AR virgin males differed in the mean number of sleep episodes (2-  
268 tailed  $t$ -test = -8.142,  $df = 17$ ,  $P < .0001$ ), their mean duration (2-tailed  $t$ -test = 7.512,  $df = 45$ ,  $P$   
269  $< .0001$ ) and also in the mean duration of rest episodes (2-tailed  $t$ -test = -6.866,  $df = 15$ ,  $P < .0001$ ),  
270 but not in their number (2-tailed  $t$ -test = 1.633,  $df = 44$ ,  $P = .109$ ). Interestingly, the mean number  
271 and duration of rest or sleep episodes for AR males, did not differ between the LP and DP (Fig 7).

272

273 **Fig 7.** Mean (SE) number (A) and duration (B) of rest episodes (light grey color) and sleep episodes (dark  
274 grey color) for W and AR virgin males (\*\*\*)  $P < .001$ .

275

## 276 **4. Discussion**

277 This study indicates that artificial rearing, mating status (virginity) and light and dark  
278 phases of photoperiod affect the locomotor activity of the olive fruit fly adults. W olive fruit flies  
279 are mostly active during the light period and bouts of inactivity (rest episodes) during this period  
280 have mean duration of 15 min. Mate searching and courtship in this species are done in late evening  
281 and W virgin males have exhibited increasing locomotor activity towards the end of the light  
282 period (Fig 1) in accordance to [34]. Locomotor activity of W flies during the dark period takes  
283 place mostly during the first hours after lights off. Inactivity bouts during the DP (sleep episodes)  
284 have a mean duration of 255-300 min for females and males respectively.

285 W females have lower locomotor levels than males, perhaps due to their heavier body and  
286 that they are monogamous. W mated males have reduced locomotor activity levels and rest  
287 episodes of longer duration compared to W virgin ones. However, W mated females have similar  
288 locomotor levels compared to W virgin ones, but have rest episodes of longer duration, which may  
289 be due to oviposition behavior. AR flies have lower locomotor activity levels compared to W ones,  
290 in accordance to many studies with mass reared insects [35]. The peak of the AR virgin males'  
291 locomotor activity is earlier than the W virgin ones (Fig 5), and earlier mating times have been  
292 observed in laboratory adapted populations [36, 37]. Furthermore, we found that AR virgin males  
293 have higher number of sleep episodes of shorter mean duration compared to W virgin males.

294 The differences that have been detected in the level of activity and sleep patterns between  
295 W and AR male olive fruit flies can be attributed to laboratory adaptation [38] and could impact

296 the AR flies' survival, dispersion and ability to compete with the wild population. Increased  
297 locomotor activity has been associated with higher mating success in Tephritidae [39]. Mass reared  
298 *B. curcubitae* have reduced flight ability than the wild flies [40], and laboratory adaptation can  
299 change the biological traits of weevils [41], affect the fitness of parasitoids used for biological  
300 control [42], or lead to loss of stress resistance to *D. melanogaster* [43].

301 Bertolini et al. [5], have compared the locomotor activity between of a wild-type and a self-  
302 limiting strain of *B. oleae*, the wild-type strain referring to *Argov* and *Democritus* strains that are  
303 laboratory adapted. These strains' day activity/h of male flies was found to be 17 counts/h and is  
304 similar with our findings of AR mature males' day activity/h (363 counts/14 h = 25.9 counts/h).  
305 The reduced activity and high mortality of flies that Bertolini et al. noticed, could have been caused  
306 because the tubes used to house the flies in the LAM device had 10 mm diameter, while we used  
307 larger tubes (25 mm diameter), allowing the olive fruit flies to move more freely and be less  
308 stressed. Circadian clock regulates daily rhythms of animal physiology and behavior, which are  
309 entrained by environmental stimuli. Sleep is one of the established circadian behavior, which is  
310 also associated with health status. In *Drosophila*, genetic dissections show that sleep is regulated  
311 by the circadian clock and the circadian clock in the *B. oleae* has a *Drosophila*-like organization  
312 [5]. Mutations of the core clock genes have abnormal sleep, while the peptidergic clock neurons  
313 regulate arousal as well as sleep stability [44]. Laboratory-adapted *B. curcubitae* strains that during  
314 domestication process were artificially selected for short larval developmental time and early  
315 reproductive age exhibited changes in traits like shorter circadian periods and later time of mating  
316 in the day compared to the wild flies [45]. These changes could be attributed to artificial selection  
317 for clock genes that pleiotropically control circadian rhythm and the time of mating [46].

318 Our study showed that AR olive fruit flies had more fragmented night sleep and less total  
319 time of night sleep compared to W flies. Sleep bouts are shortened resulting in fragmented night  
320 sleep, with implications on their overall fitness and longevity and reduced night sleep quality might  
321 affect their day activity levels in humans [47]. When sleep is insufficient, important brain  
322 processes such as learning and memory are affected, and, when sleep is insufficient over the short  
323 term, this effect can be reversed by supplemental sleep [48].

324 Reduced levels of day activity for AR flies could be explained to poor night sleep quality.  
325 There are two processes, the circadian clock and the sleep homeostat that work together to regulate  
326 sleep. Circadian clock is responsible regulating the oscillation of sleep pressure during the day,  
327 while sleep homeostat conveys the need for sleep depending on the duration and quality of  
328 previous wake periods. If sleep is disrupted, the homeostat process is able to overcome the  
329 circadian process, and induce sleep into a period of the day that is normally dedicated to other  
330 activities, such as feeding and mating. This compensatory sleep is often referred to as “rebound  
331 sleep.” In insects, sleep also has an impact on fitness and can affect reproductive output and  
332 development [49]. Importantly, sleep-deprived males show reduced courtship behavior. Also,  
333 males lacking a functional clock show a significant decline in the quantity of sperm in *D.*  
334 *melanogaster*, for which it was demonstrated that clock genes are rhythmically and autonomously  
335 expressed in testes and seminal vesicles of male flies, suggesting that these tissues harbor a  
336 circadian system important for optimal sperm output and fertility [50].

337 Finally, the same experiments should be repeated in natural conditions, because the natural  
338 environment provides much richer cycling environmental stimuli than the laboratory and generally  
339 accepted adaptive and mechanistic explanations for fly circadian behavior from laboratory  
340 experiments may require some revision if they are to account for rhythmicity in nature [51].

341

342 **References**

- 1 Daane KM, Johnson MW. Olive Fruit Fly: Managing an Ancient Pest in Modern Times. *Annu Rev Entomol.* 2010 Jan 1;55(1):151–69.
- 2 Rice RE, Phillips PA, Stewart-Leslie J, Sibbett GS. Olive fruit fly populations measured in central and southern California. *California Agriculture.* 2003 Oct 1;57(4).
- 3 Wang X, Walton VM, Hoelmer KA, Pickett CH, Blanchet A, Straser RK, et al. Exploration for olive fruit fly parasitoids across Africa reveals regional distributions and dominance of closely associated parasitoids. *Sci Rep.* 2021 Mar 17;11(1):1–14.
- 4 Estes AM, Nestel D, Belcari A, Jessup A, Rempoulakis P, Economopoulos AP. A basis for the renewal of sterile insect technique for the olive fly, *Bactrocera oleae* (Rossi). *J Appl Entomol.* 2012;136(1–2):1–16.
- 5 Bertolini E, Kistenpfennig C, Menegazzi P, Keller A, Koukidou M, Helfrich-Förster C. The characterization of the circadian clock in the olive fly *Bactrocera oleae* (Diptera: Tephritidae) reveals a *Drosophila*-like organization. *Sci Rep.* 2018 Dec 1;8(1):1–12.
- 6 Calkins CO, Parker AG. Sterile insect quality. In *Sterile insect technique 2005* (pp. 269-296). Springer, Dordrecht.
- 7 Reger J, Wenger JA, Brar G, Burks C, Wilson H. Evaluating Flight Performance of Mass-Reared and Irradiated Navel Orangeworm (Lepidoptera: Pyralidae) for Sterile Insect Technique. *J Econ Entomol.* 2021 Aug 5;114(4):1542–8.



- 8 Weldon CW, Prenter J, Taylor PW. Activity patterns of Queensland fruit flies (*Bactrocera tryoni*) are affected by both mass-rearing and sterilization. *Physiol Entomol*. 2010 Jun 1;35(2):148–53.
- 9 Manenti T, Pertoldi C, Nasiri N, Schou MF, Kjærsgaard A, Cavicchi S, et al. Inbreeding Affects Locomotor Activity in *Drosophila melanogaster* at Different Ages. *Behav Genet*. 2015 Jan 1;45(1):127–34.
- 10 Schutze MK, Dammalage T, Jessup A, Vreysen MJB, Wornoayporn V, Clarke AR. Effects of laboratory colonization on *Bactrocera dorsalis* (Diptera, tephritidae) mating behaviour: ‘what a difference a year makes.’ *Zookeys*. 2015;(540):369–83.
- 11 RÖBLER, DC, et al. Regularly occurring bouts of retinal movements suggest an REM sleep–like state in jumping spiders. *Proceedings of the National Academy of Sciences*, 2022; 119.33: e2204754119.
- 12 Jagannath A, Taylor L, Wakaf Z, Vasudevan SR, Foster RG. The genetics of circadian rhythms, sleep and health. *Human molecular genetics*. 2017 Oct 1;26(R2):R128-38.
- 13 Mazzotta GM, Damulewicz M, Cusumano P. Better Sleep at Night: How Light Influences Sleep in *Drosophila*. *Front Physiol*. 2020 Sep 4;11:997.
- 14 Ishimoto H, Lark A, Kitamoto T. Factors that differentially affect daytime and nighttime sleep in *Drosophila melanogaster*. *Front Neurol*. 2012;Feb:1–5.
- 15 Thompson JB, Su OO, Yang N, Bauer JH. Sleep-length differences are associated with altered longevity in the fruit fly *Drosophila melanogaster*. *Biol Open*. 2020 Sep 1;9(9).
- 16 Shaw PJ, Tortoni G, Greenspan RJ, Robinson DF. Stress response genes protect against lethal effects of sleep deprivation in *Drosophila*. *Nat*. 2002 May 16;417(6886):287–91.

- 17 Tougeron K, Abram PK. An Ecological Perspective on Sleep Disruption. *Am Nat.* 2017 Jun 26;190(3):E55–66.
- 18 Pfeiffenberger C, Lear BC, Keegan KP, Allada R. Locomotor Activity Level Monitoring Using the *Drosophila* Activity Monitoring (DAM) System. *Cold Spring Harb Protoc.* 2010 Nov 1;2010(11):pdb.prot5518.
- 19 Cichewicz K, Hirsh J. ShinyR-DAM: a program analyzing *Drosophila* activity, sleep and circadian rhythms. *Commun Biol.* 2018 Apr 5;1(1):1–5.
- 20 Dubowy C, Sehgal A. Circadian Rhythms and Sleep in *Drosophila melanogaster*. *Genetics.* 2017 Apr 1;205(4):1373–97.
- 21 Andretic R, Shaw PJ. Essentials of sleep recordings in *Drosophila*: Moving beyond sleep time. *Methods Enzymol.* 2005 Jan 1;393:759–72.
- 22 Huber, R., Hill, S. L., Holladay, C., Biesiadecki, M., Tononi, G., & Cirelli, C. Sleep homeostasis in *Drosophila melanogaster*. *Sleep.* 2004, 27(4), 628-639.
- 23 Tasman, K., Rands, S. A., & Hodge, J. J. Using radio frequency identification and locomotor activity monitoring to assess sleep, locomotor, and foraging rhythmicity in bumblebees. *STAR protocols.* 2021 Jun 18;2(2):100598.
- 24 Beyaert L, Greggers U, Menzel R. Honeybees consolidate navigation memory during sleep. *J Exp Biol.* 2012 Nov 15;215(22):3981–8.
- 25 Tsitsipis JA. An improved method for the mass rearing of the olive fruit fly, *Dacus oleae* (Gmel.)(Diptera, Tephritidae). *Zeitschrift für Angewandte Entomologie.* 1977 Jan 12;83(1-4):419-26.

- 26 Manoukas AG. Nutritional, biochemical, and biological aspects of quality control in the olive fruit fly. In *Fruit Flies and the Sterile Insect Technique 2019 Jul 23* (pp. 73-83). CRC Press.
- 27 Meats A, Holmes HM, Kelly GL. Laboratory adaptation of *Bactrocera tryoni* (Diptera: Tephritidae) decreases mating age and increases protein consumption and number of eggs produced per milligram of protein. *Bull Entomol Res.* 2004 Dec;94(6):517–24.
- 28 Mazomenos BE. Effect of age and mating on pheromone production in the female olive fruit fly, *Dacus oleae* (Gmel.). *Journal of insect physiology.* 1984 Jan 1;30(10):765-9.
- 29 Terzidou, A., Koveos, D., & Kouloussis, N. Mating Competition between Wild and Artificially Reared Olive Fruit Flies. *Crops.* 2022; 2(3), 247-257.
- 30 McInnis, D. O., Paranhos, B. J., & Shelly, T. E. Survival of sterile male Mediterranean fruit flies in large field cages after release at different ages. *J Appl Entomol.* 2013 Jun;137:43-8.
- 31 Rodovitis, V. G., Papanastasiou, S. A., Bataka, E. P., Nakas, C. T., Koulousis, N. A., Carey, J. R., & Papadopoulos, N. T. Electronic recording of lifetime locomotory activity patterns of adult medflies. *PloS one.* 2022; 17(7), e0269940.
- 32 Donelson N, Kim EZ, Slawson JB, Vecsey CG, Huber R, and Griffith, LC. High-Resolution Positional Tracking for Long-Term Analysis of *Drosophila* Sleep and Locomotion Using the “Tracker” Program. *PLoS one.* 2012; 7(5): e37250.
- 33 Sall, J, Lehman, A, Stephens, M, Loring, S. *JMP®Start Statistics: A Guide to Statistics and Data Analysis Using JMP®, 6th ed.*, SAS Institute Inc.: Cary, NC, USA; 2017.
- 34 Loher W, Zervas G. The mating rhythm of the olive fruitfly, *Dacus oleae* Gmelin. *Zeitschrift für Angewandte Entomologie.* 1979 Jan 12;88(1-5):425-35.

- 35 Calla, B., Hall, B., Hou, S. et al. A genomic perspective to assessing quality of mass-reared SIT flies used in Mediterranean fruit fly (*Ceratitis capitata*) eradication in California. *BMC Genomics*. 2014 Dec;15(1):1-9.
- 36 Weldon, C. W. Mass-rearing and sterilisation alter mating behaviour of male Queensland fruit fly, *Bactrocera tryoni* (Froggatt)(Diptera: Tephritidae). *Australian Journal of Entomology*. 2005 May;44(2):158-63.
- 37 Miyatake, T. Genetic changes of life history and behavioral traits during mass-rearing in the melon fly, *Bactrocera cucurbitae* (Diptera: Tephritidae). *Population Ecology*. 1998 Dec; 40(3), 301-10.
- 38 Hoffmann AA, Ross PA. Rates and Patterns of Laboratory Adaptation in (Mostly) Insects. *J Econ Entomol*. 2018 Apr 2;111(2):501–9.
- 39 Kumaran N, Prentis PJ, Mangalam KP, Schutze MK, Clarke AR. Sexual selection in true fruit flies (Diptera: Tephritidae): transcriptome and experimental evidences for phytochemicals increasing male competitive ability. *Mol Ecol*. 2014 Sep 1;23(18):4645–57.
- 40 Nakamori H, Simizu K, Nakamori H, Simizu K. Comparison of Flight Ability between Wild and Mass-Reared Melon Fly, *Dacus cucurbitae* COQUILLET (Diptera: Tephritidae), Using a Flight Mill. *Appl Entomol Zool*. 1983 Aug 25;18(3):371–81.
- 41 Kuriwada T, Kumano N, Shiromoto K, Haraguchi D. Effect of Mass Rearing on Life History Traits and Inbreeding Depression in the Sweetpotato Weevil (Coleoptera: Brentidae). *J Econ Entomol*. 2010 Aug 1;103(4):1144–8.

- 42 Bertin A, Pavinato VAC, Parra JRP. Fitness-related changes in laboratory populations of the egg parasitoid *Trichogramma galloi* and the implications of rearing on factitious hosts. *BioControl* 2017 624. 2017 Feb 10;62(4):435–44.
- 43 Hoffmann AA, Hallas R, Sinclair C, Partridge L. Rapid loss of stress resistance in *Drosophila melanogaster* under adaptation to laboratory culture. *Evolution*. 2001 Feb 1;55(2):436–8.
- 44 Xia X, Fu X, Du J, Wu B, Zhao X, Zhu J, et al. Regulation of circadian rhythm and sleep by miR-375-timeless interaction in *Drosophila*. *FASEB J*. 2020 Dec 1;34(12):16536–51.
- 45 Miyatake T. Genetic changes of life history and behavioral traits during mass-rearing in the melon Fly, *Bactrocera cucurbitae* (Diptera: Tephritidae). *Popul Ecol*. 1998 Dec 1;40(3):301–10.
- 46 Miyatake T, Matsumoto A, Matsuyama T, Ueda HR, Toyosato T, Tanimura T. The period gene and allochronic reproductive isolation in *Bactrocera cucurbitae*. *Proc R Soc London Ser B Biol Sci*. 2002 Dec 7;269(1508):2467–72.
- 47 Cox NS, Pepin V, Holland AE. Greater Sleep Fragmentation Is Associated with Less Physical Activity in Adults with Cystic Fibrosis. *J Cardiopulm Rehabil Prev*. 2019 Jan 1;39(1):E11–4.
- 48 Xie J, Wang D, Ling S, Yang G, Yang Y, Chen W. High-Salt Diet Causes Sleep Fragmentation in Young *Drosophila* Through Circadian Rhythm and Dopaminergic Systems. *Front Neurosci*. 2019 Nov 29;13:1271.
- 49 Beckwith EJ, French AS. Sleep in *Drosophila* and Its Context. *Front Physiol*. 2019 Sep 11;10:1167.

- 50 Beaver LM, Gvakharia BO, Vollintine TS, Hege DM, Stanewsky R, Giebultowicz JM. Loss of circadian clock function decreases reproductive fitness in males of *Drosophila melanogaster*. *Proc Natl Acad Sci*. 2002 Feb 19;99(4):2134–9.
- 51 Vanin S, Bhutani S, Montelli S, Menegazzi P, Green EW, Pegoraro M, Sandrelli F, Costa R, Kyriacou CP. Unexpected features of *Drosophila* circadian behavioural rhythms under natural conditions. *Nature*. 2012 Apr;484(7394):371-5.

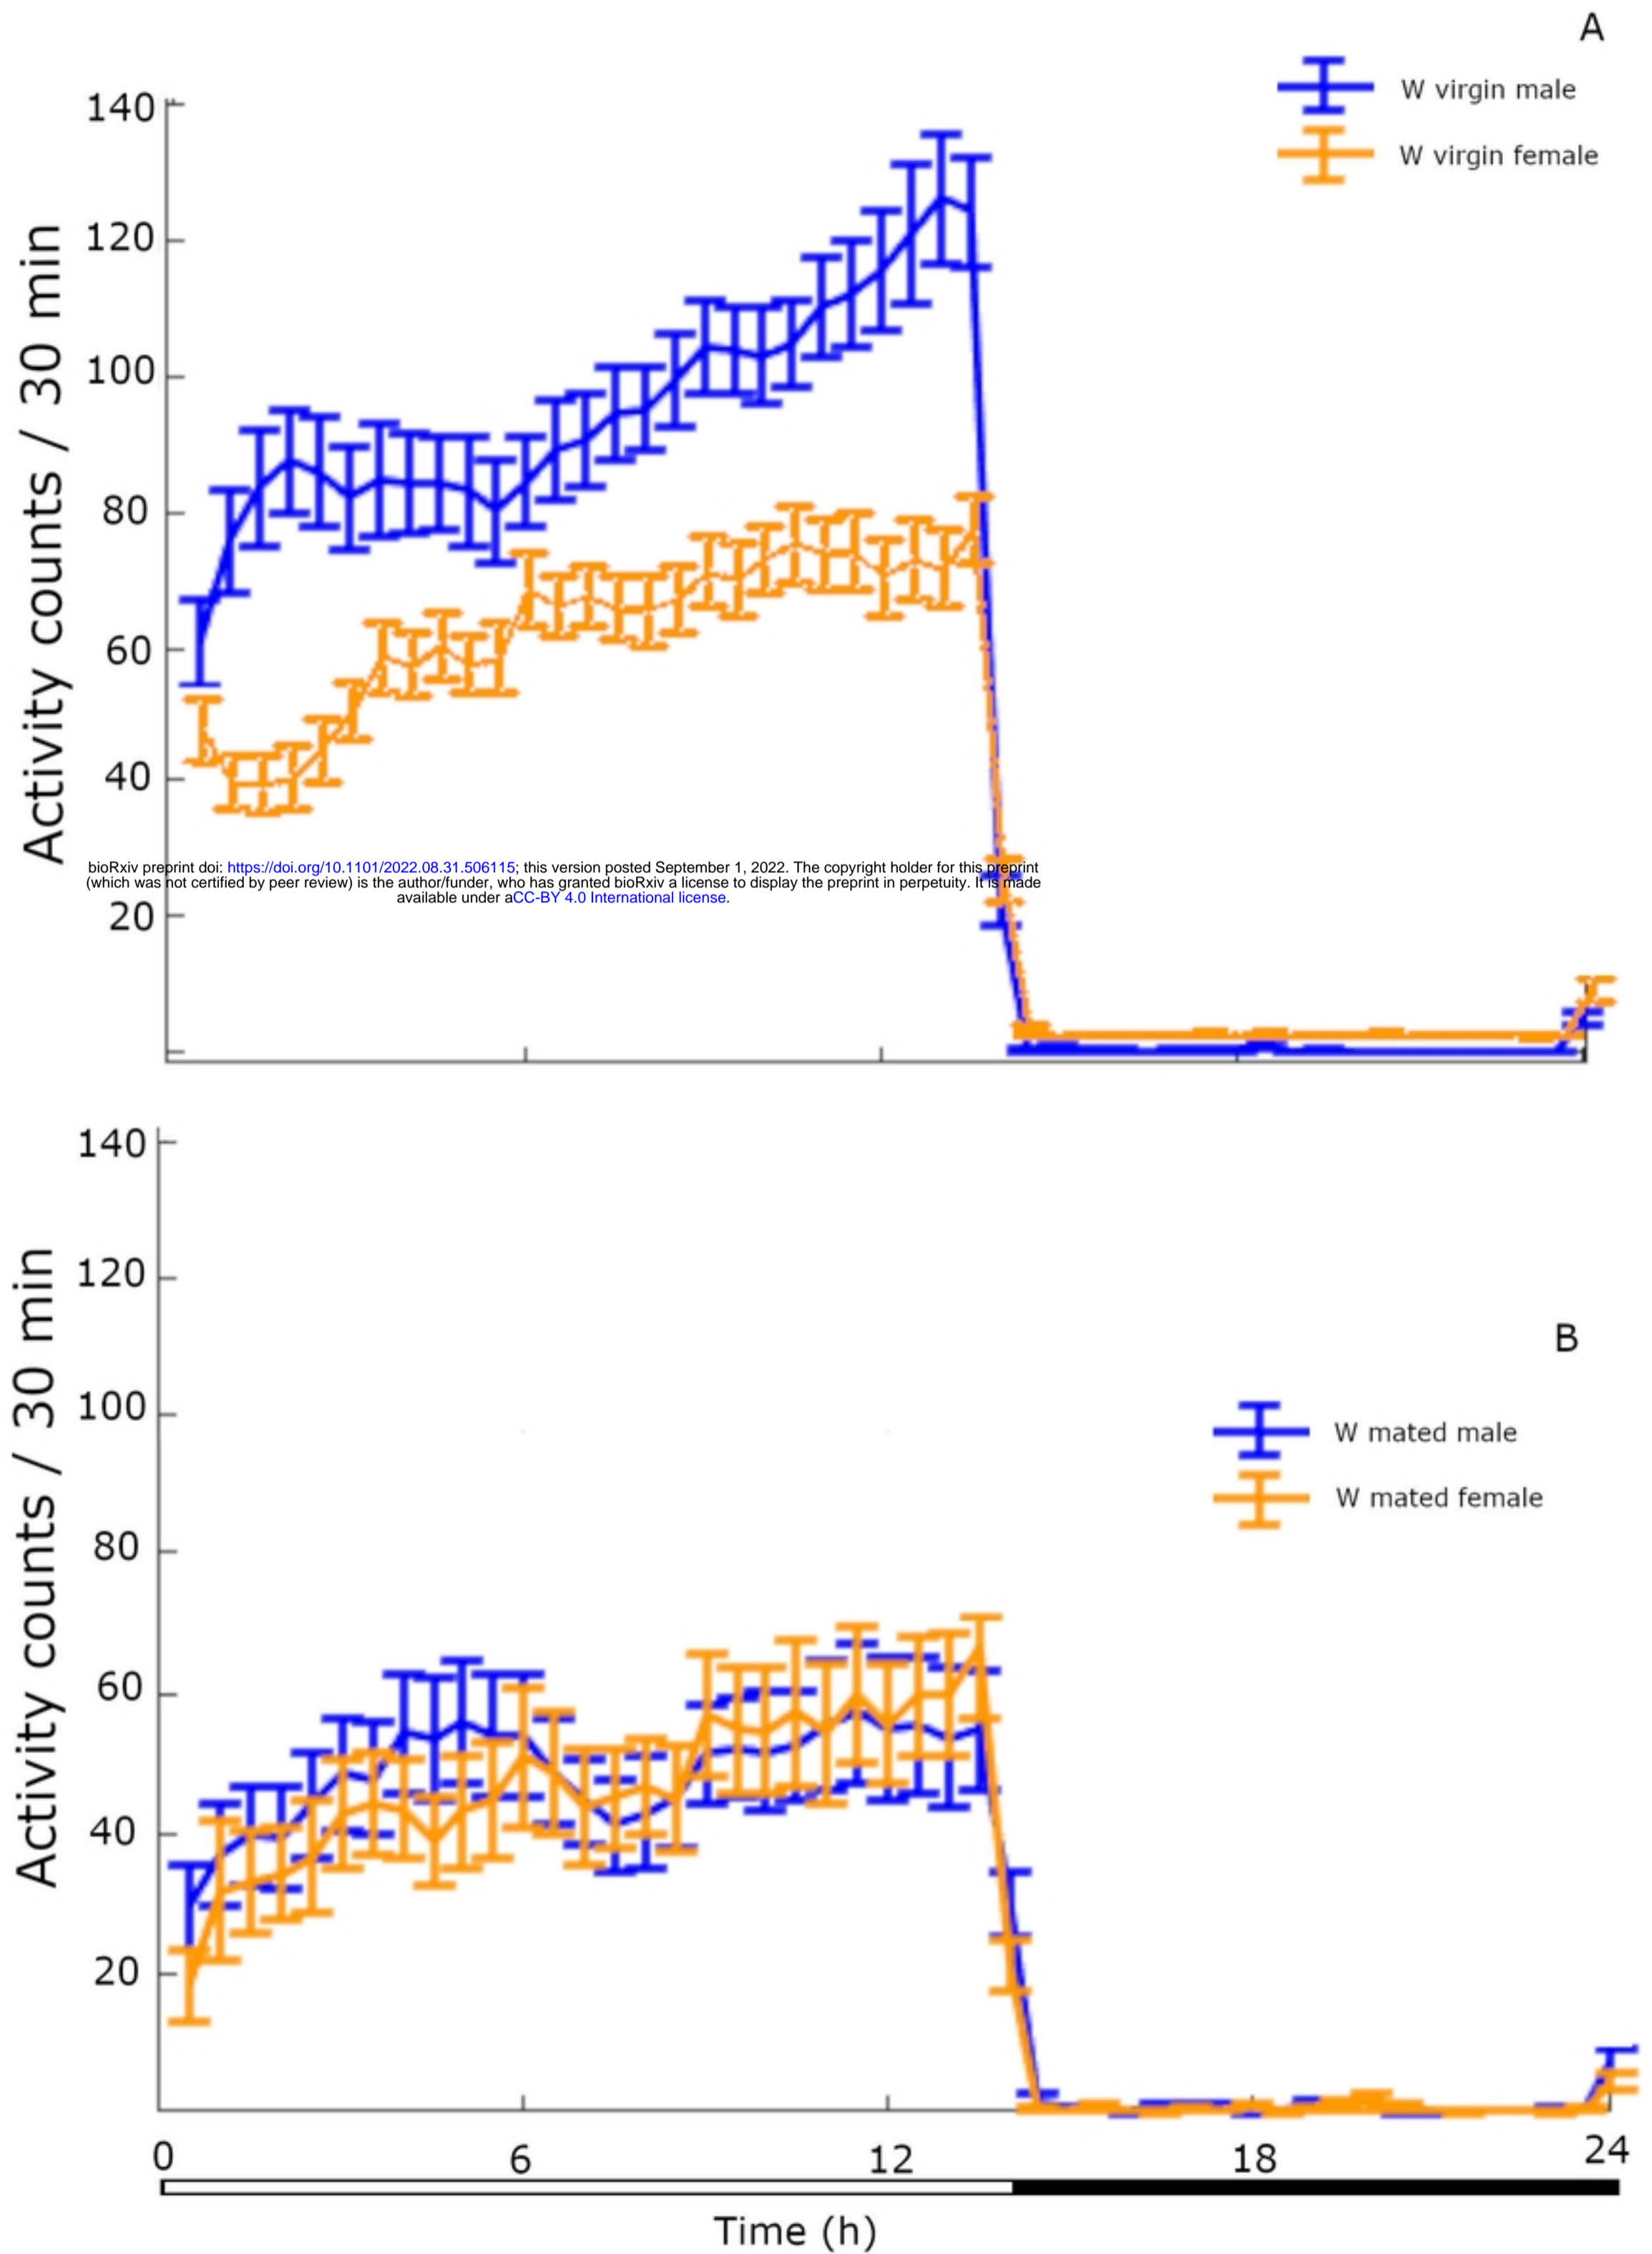

Figure1

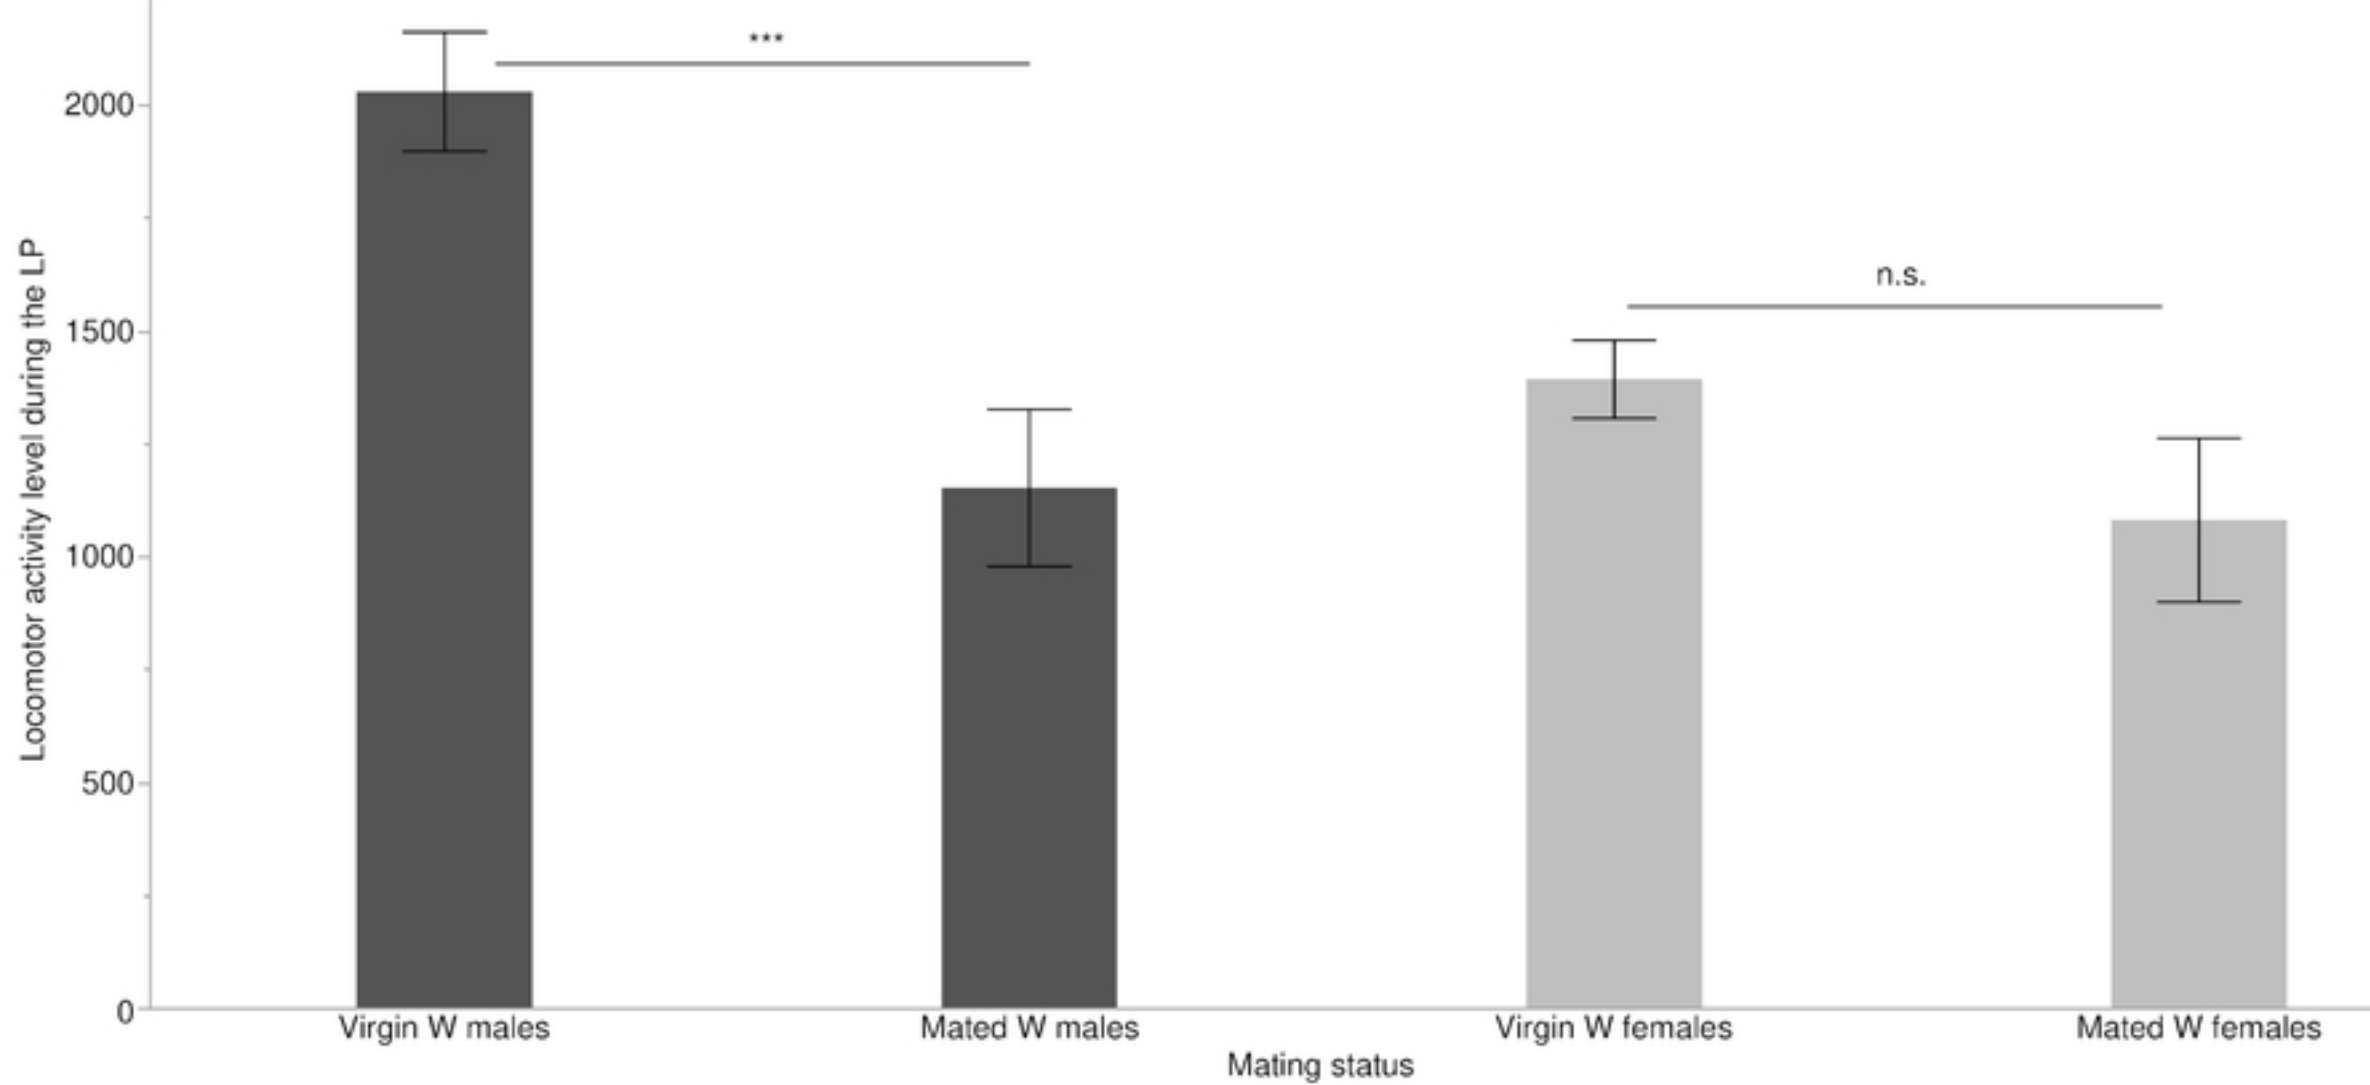

Figure2



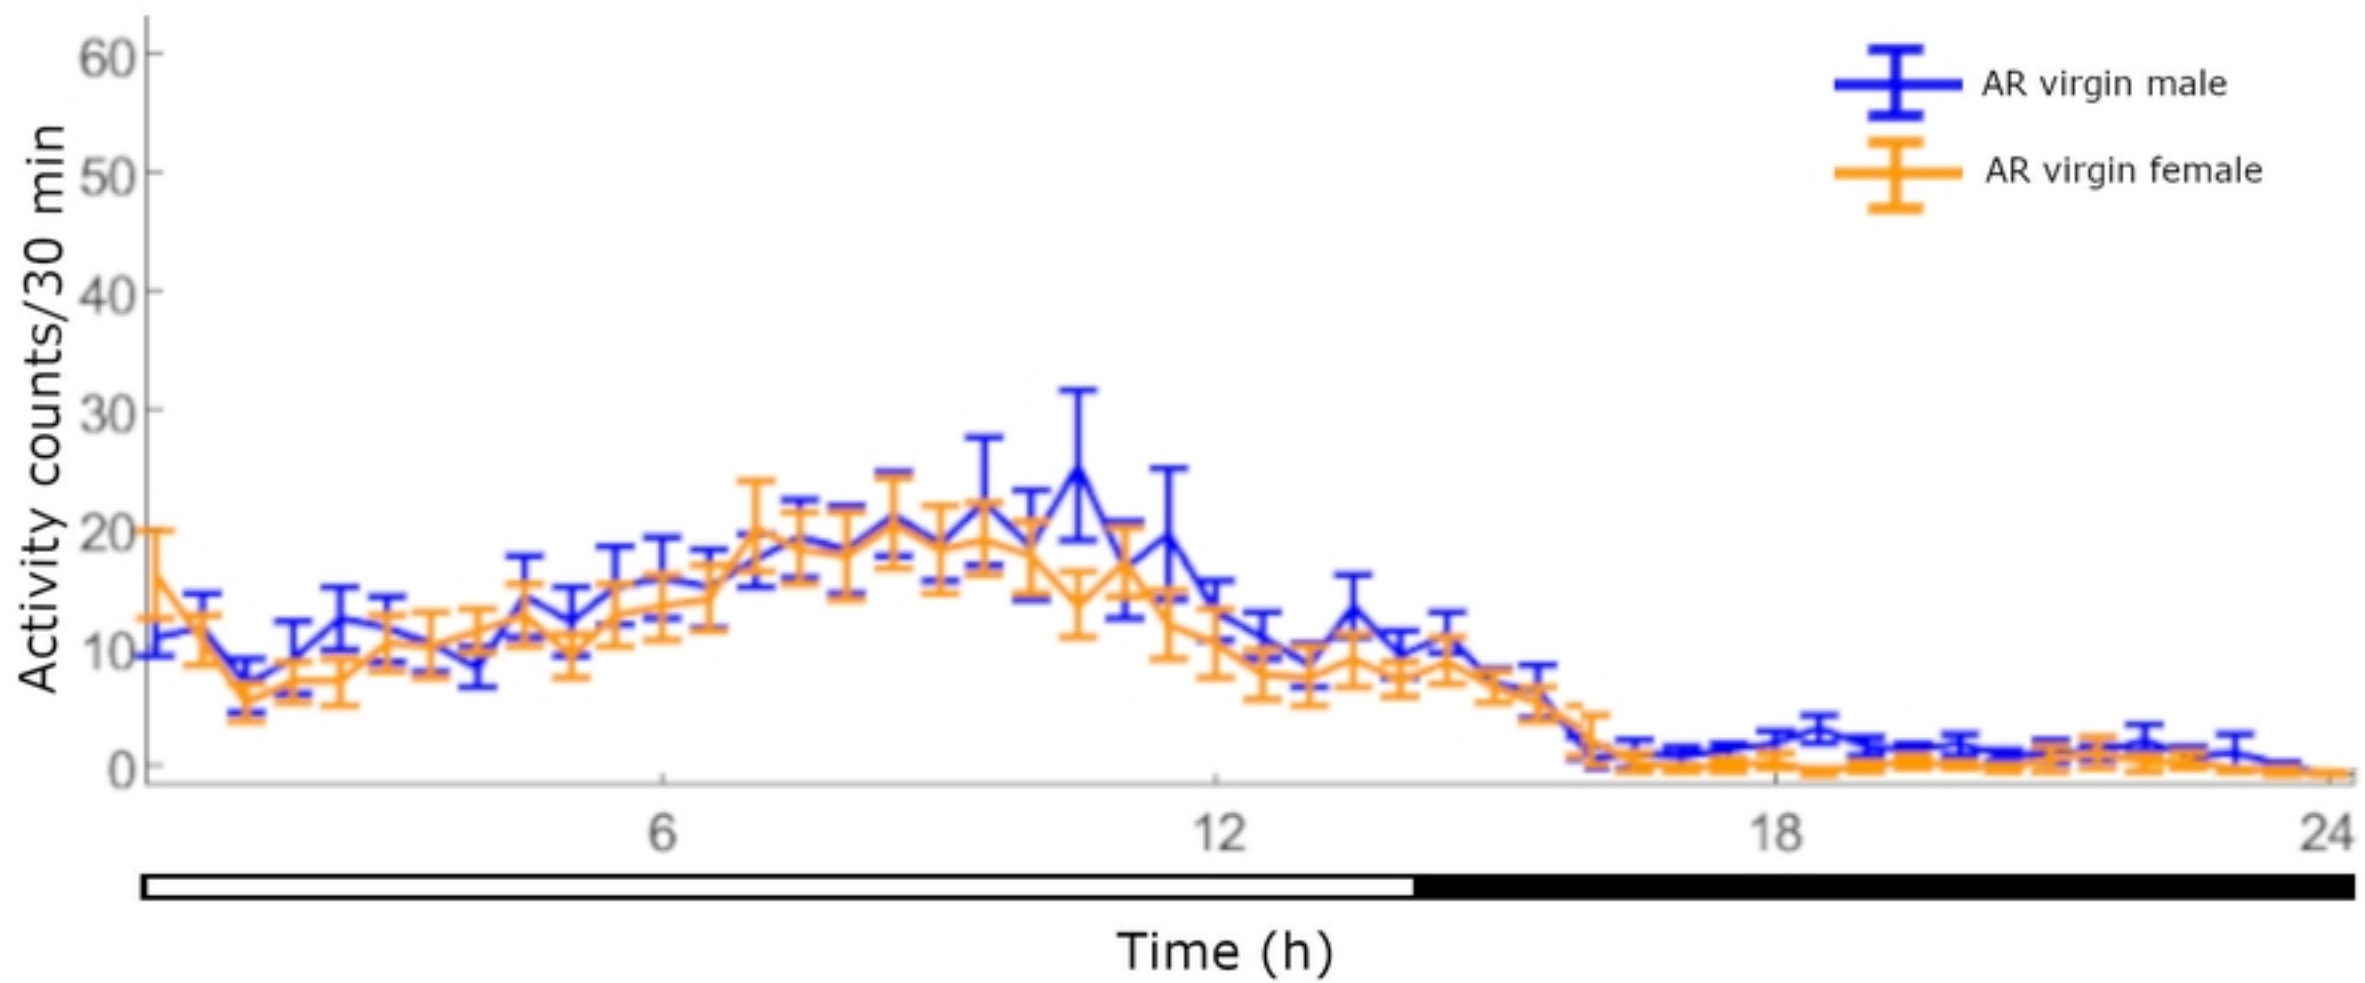

Figure3

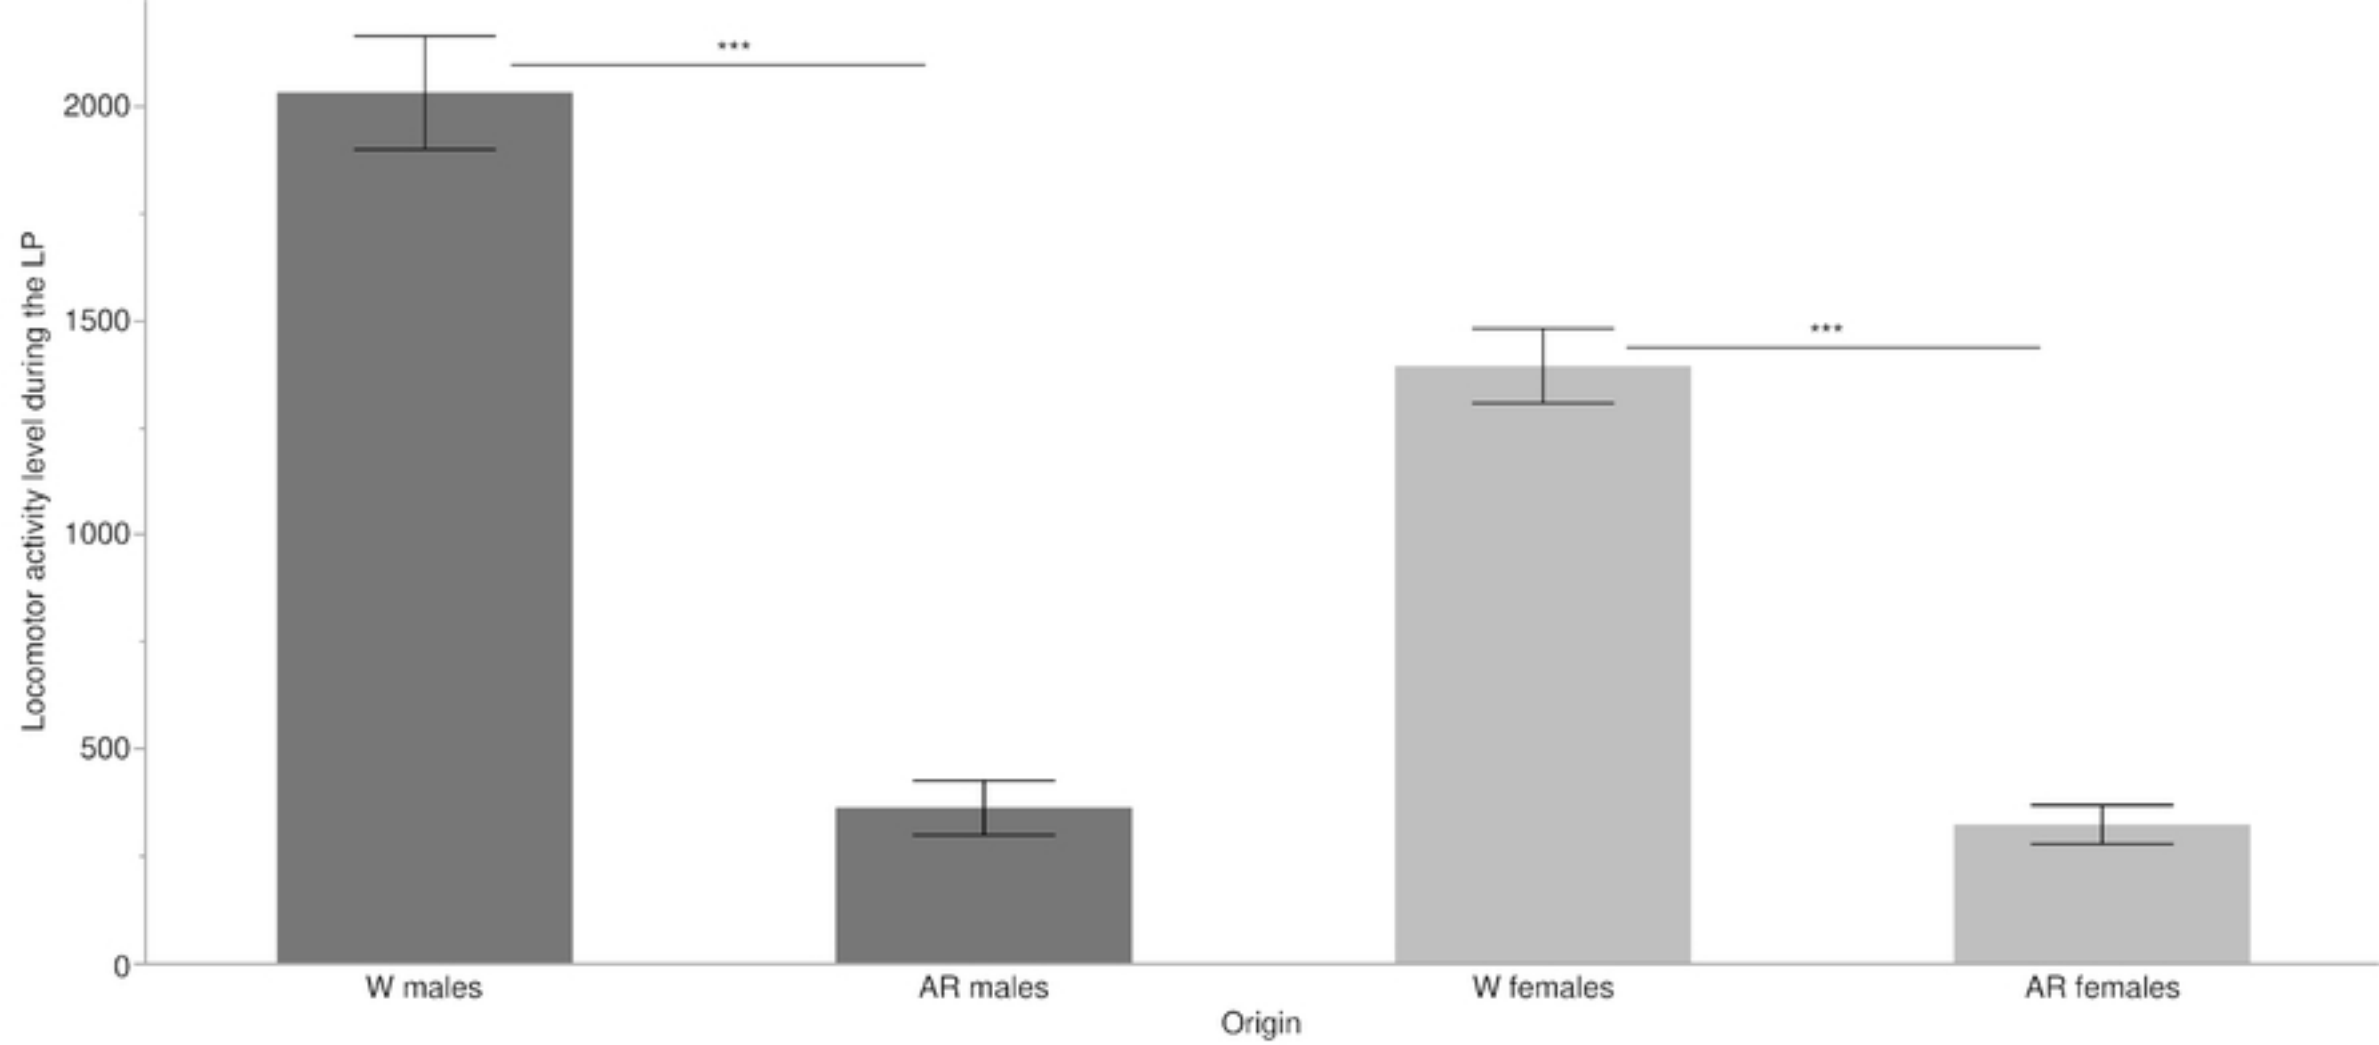

Figure4

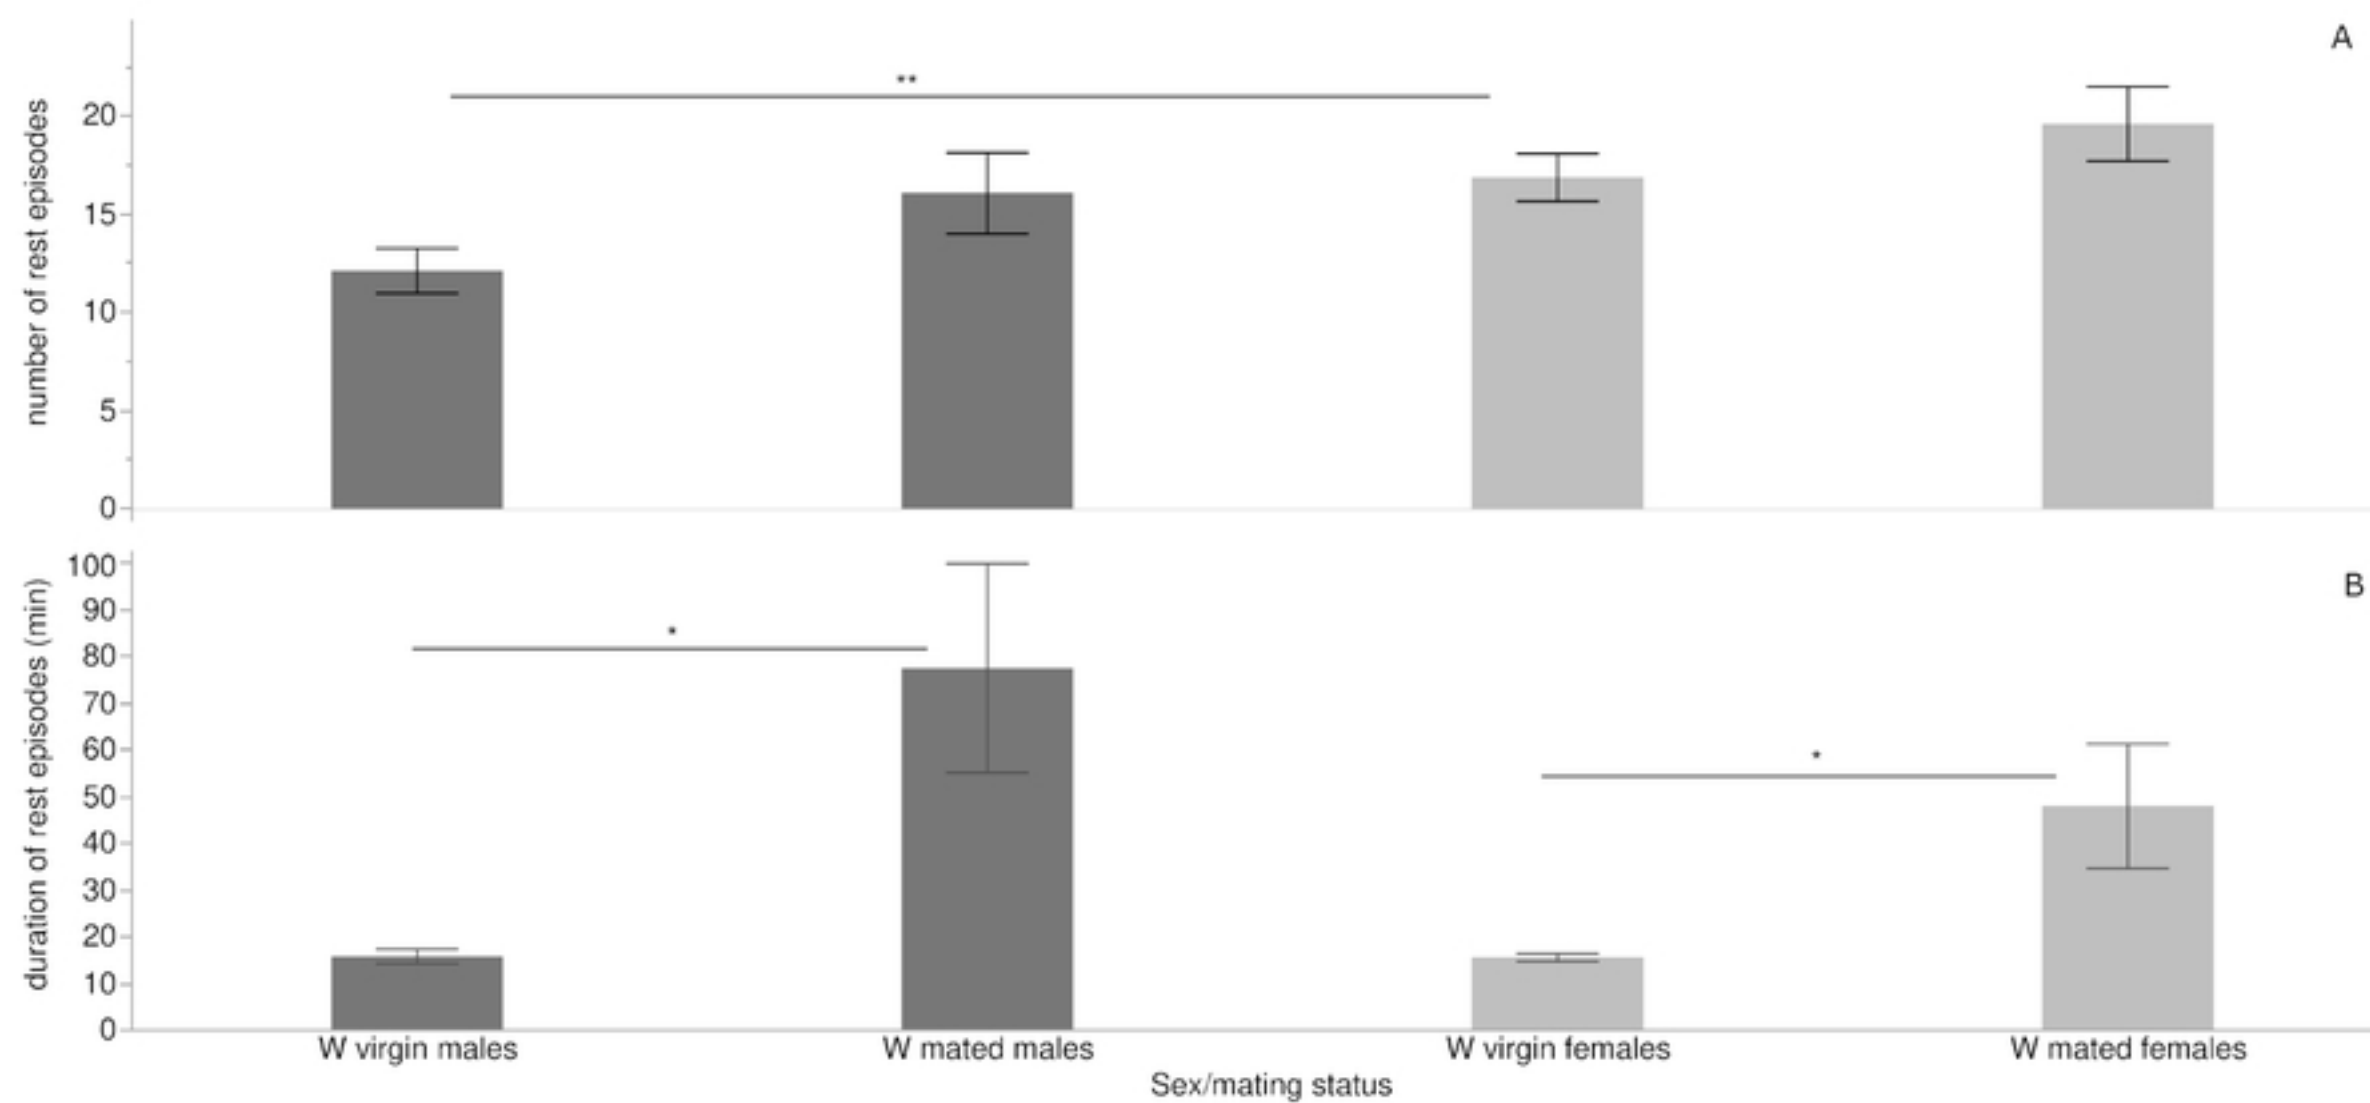

Figure 5

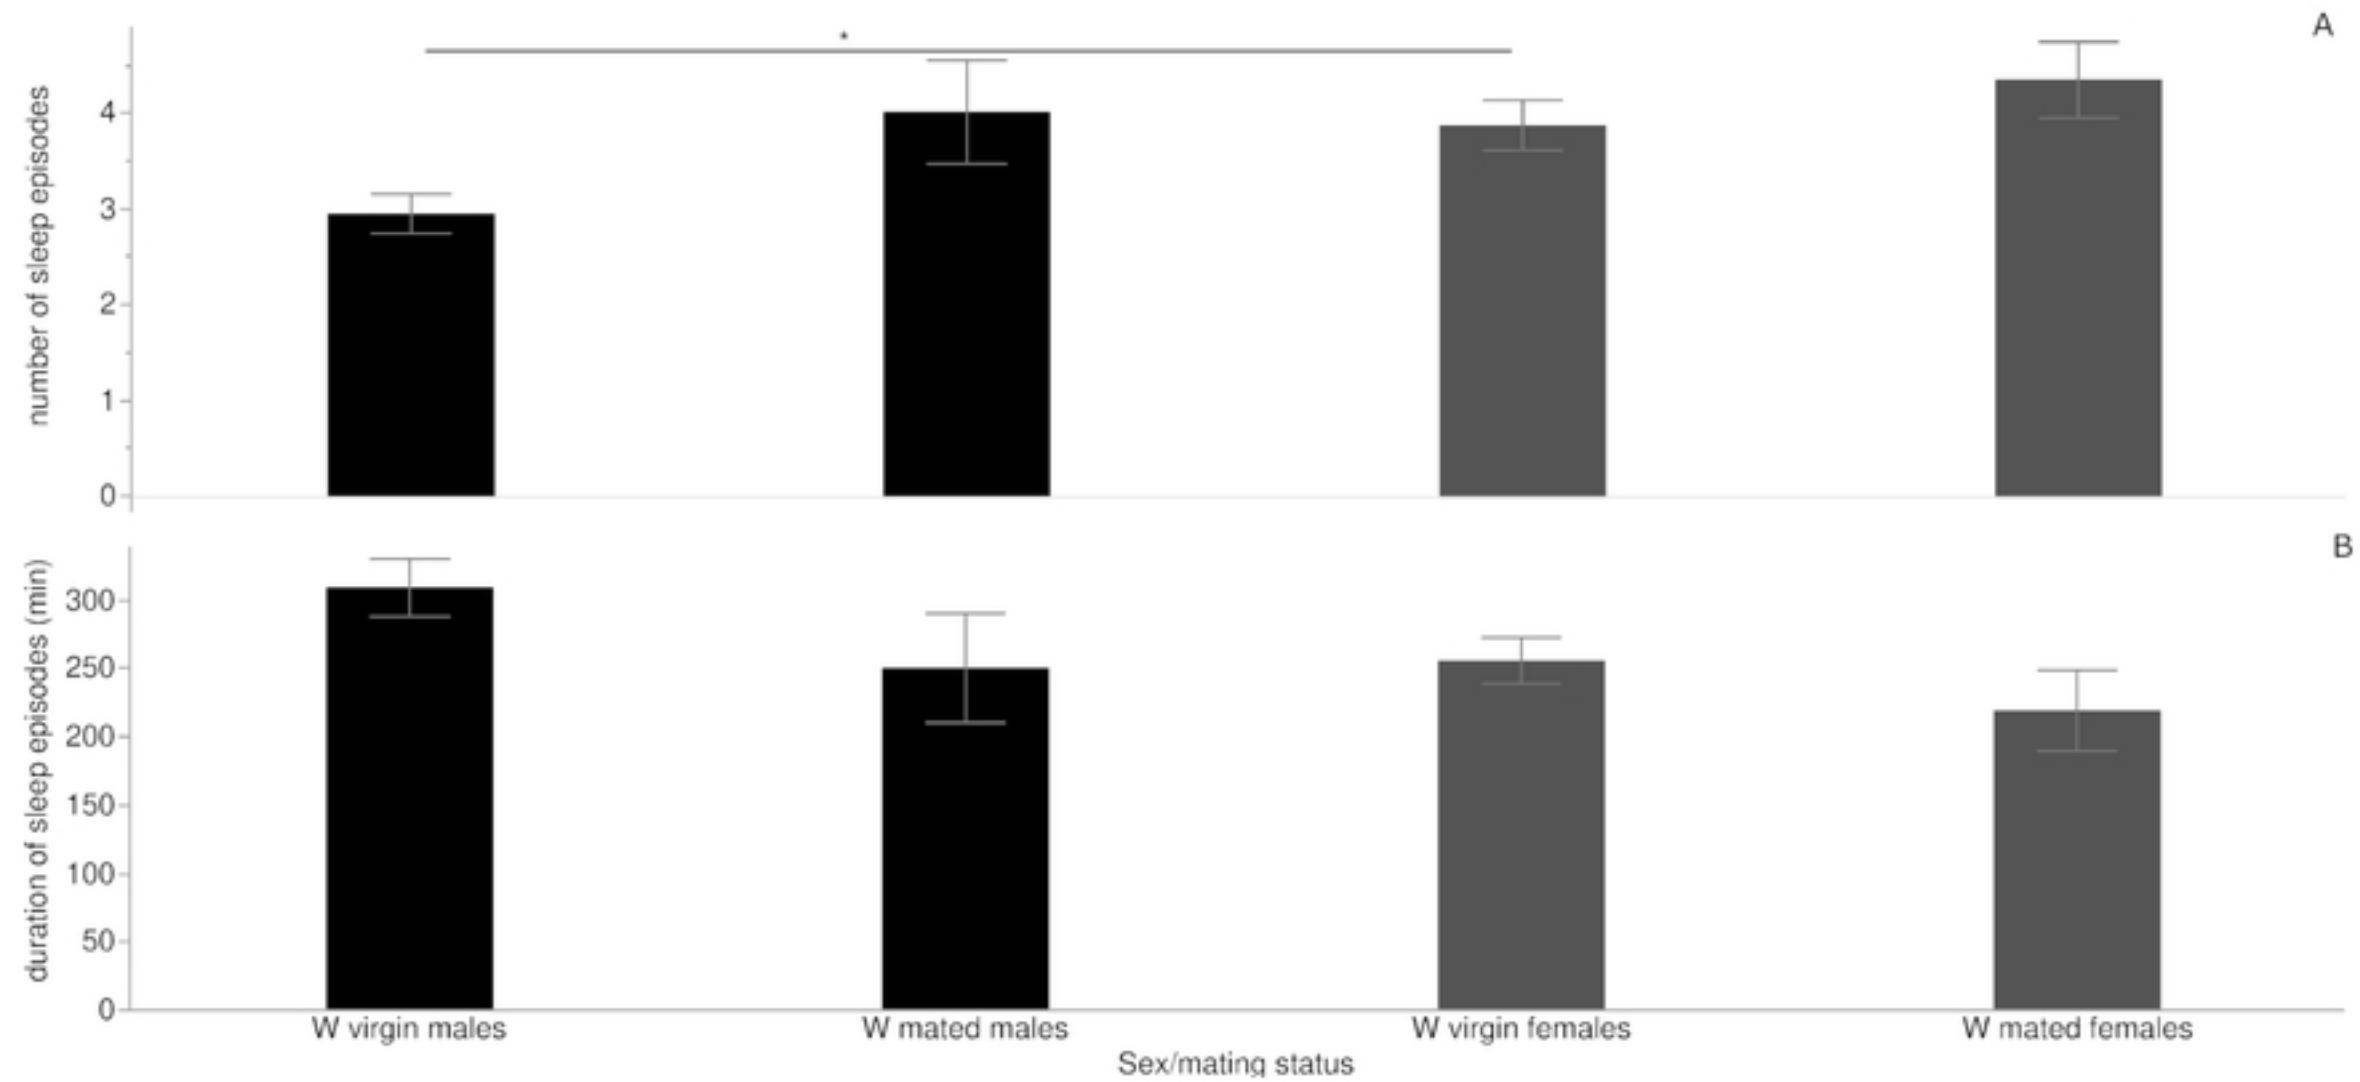

Figure6

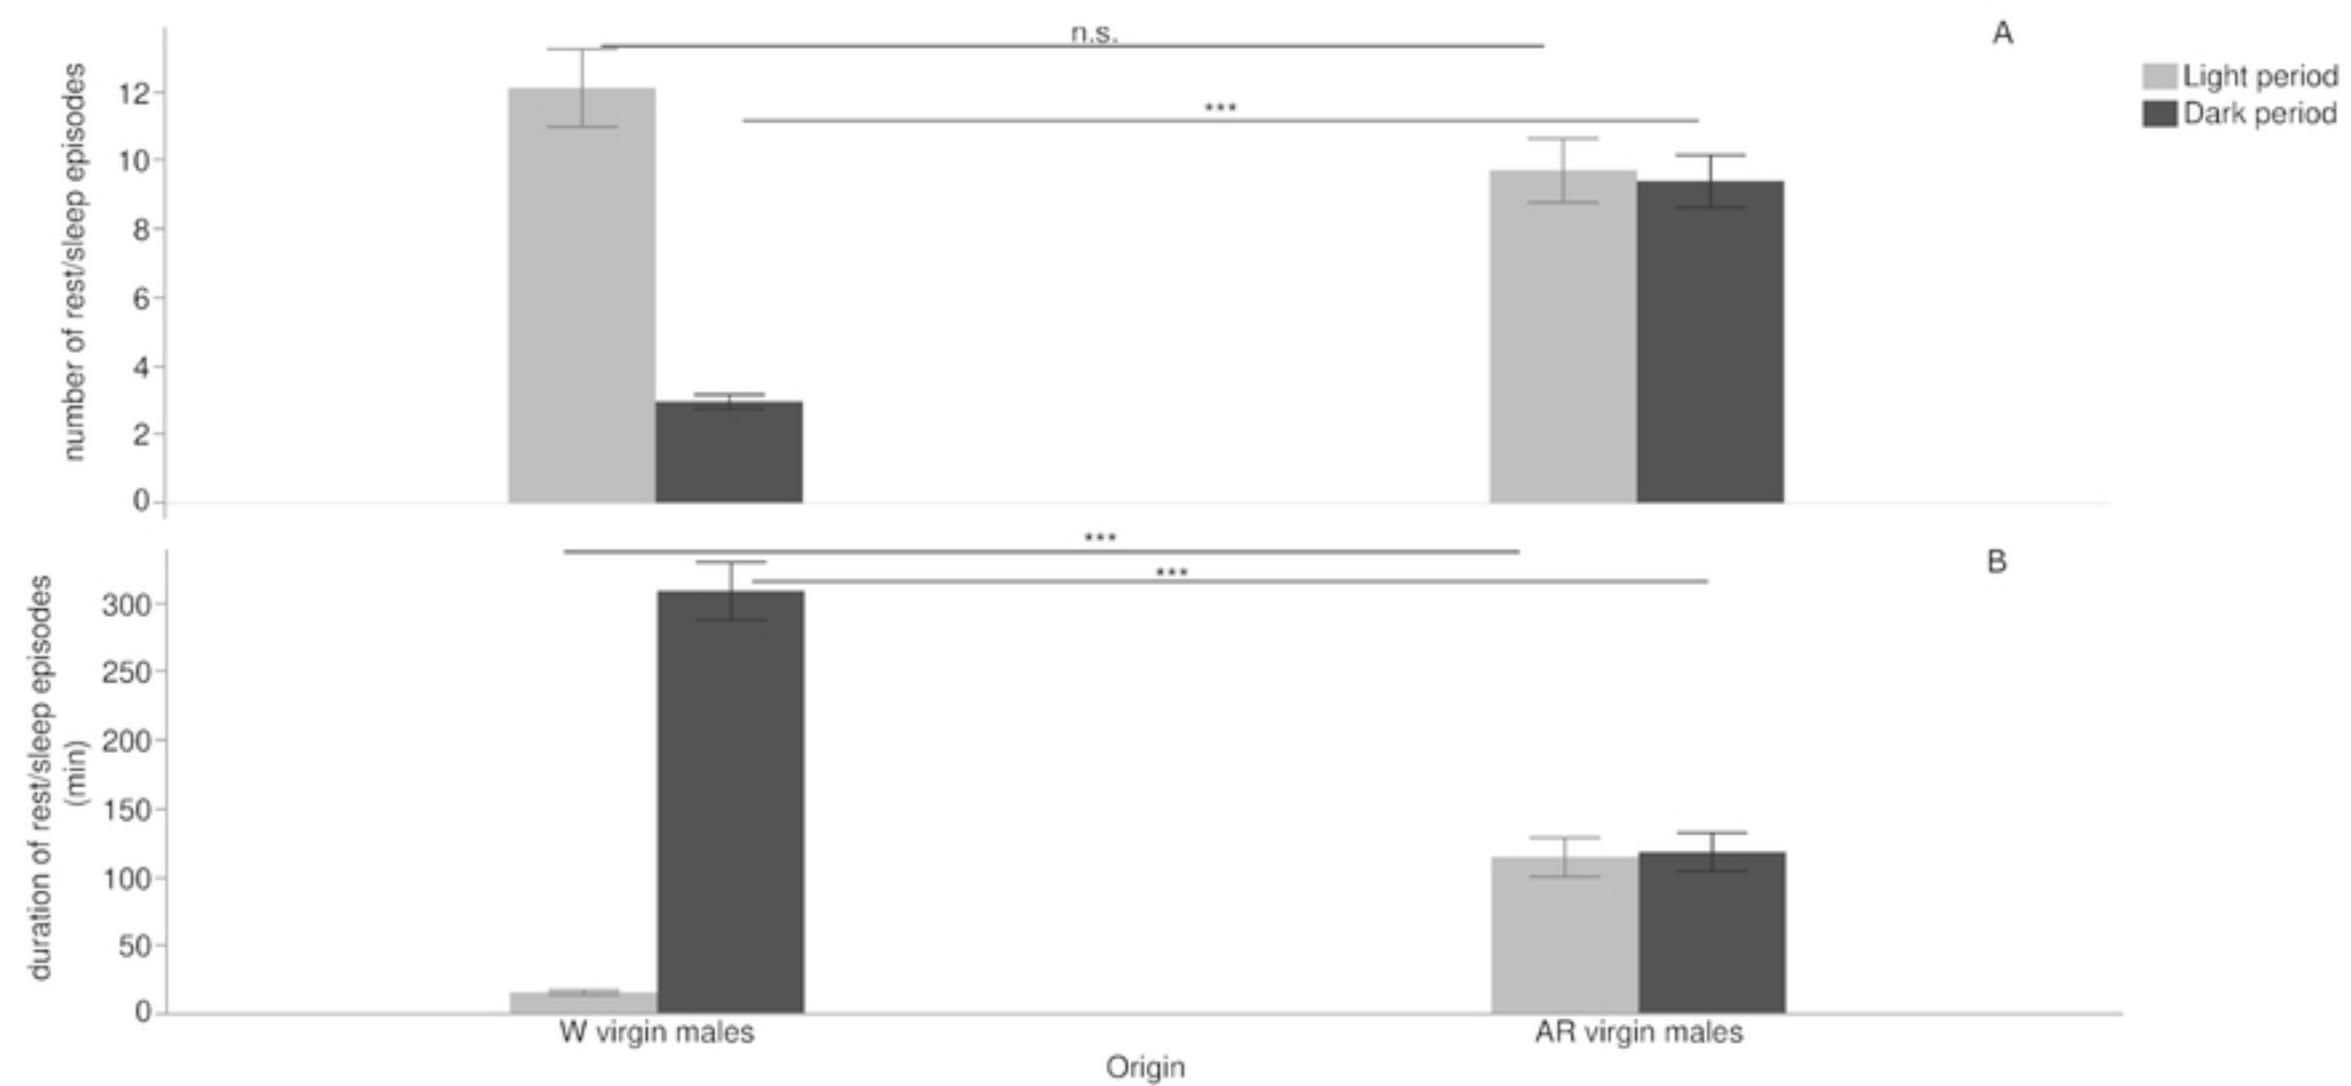

Figure7
